# Supplementary material for: Enhancing the cycling performance of manganese oxides through pre-sodiation for aqueous Zn-ion batteries
Source: Royal Society of Chemistry journal article supplement (doi:10.1039/d4ma00824c), 2024-01-01
Supplement: d4ma00824c1.pdf [file d4ma00824c1.pdf]

## Supplementary Information

### **Enhancing the Cycling Performance of Manganese Oxides through Pre-sodiation for Aqueous Zn-ion Batteries**

Anjeline Williams, Prasant Kumar Nayak\*

Materials Electrochemistry Research Laboratory, Department of Chemistry, SRM Institute of Science and Technology, Kattankulathur-603203, Tamil Nadu, India

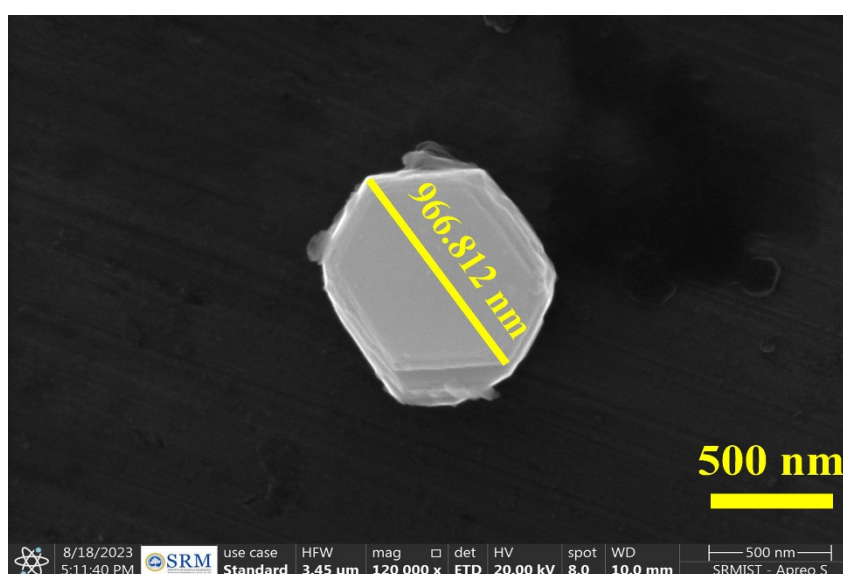

**Fig. S1** HRSEM image of  $\text{Na}_{0.6}\text{MnO}_2$  displaying hexagonal sheet of size 966.8 nm at the magnification of 500 nm.

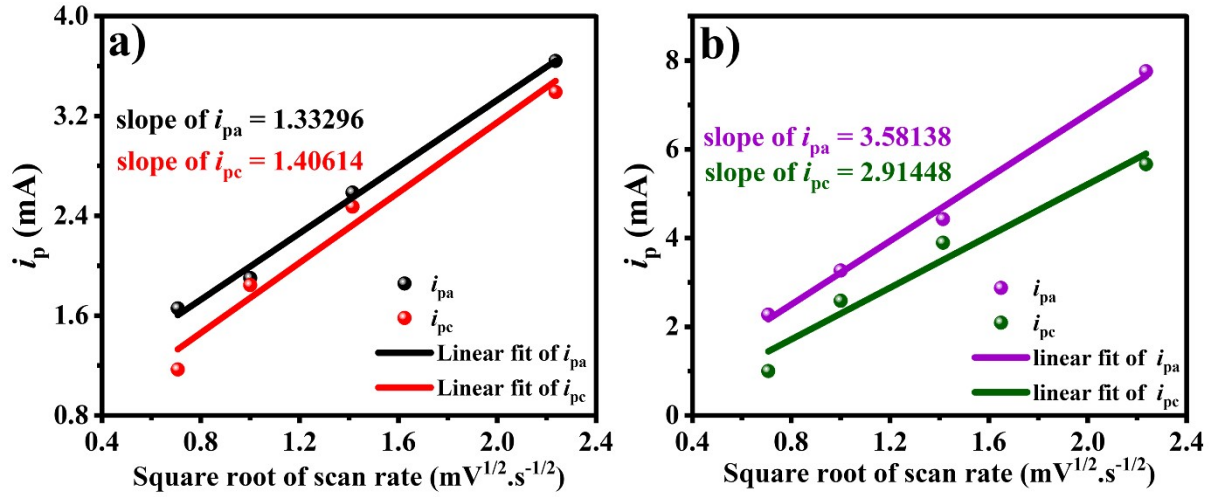

**Fig. S2 (a, b)** Plots of the peak current vs. square root of scan rate for  $\text{Na}_{0.6}\text{MnO}_2$  and  $\text{Mn}_2\text{O}_3$ . The  $\text{Zn}^{2+}$  diffusion coefficient was calculated using Randles-Sevcik equation:

$$I_p = 2.69 \times 10^5 \cdot n^{3/2} \cdot AC \cdot D_{\text{Zn}^{2+}}^{1/2} \cdot v^{1/2}$$

Where  $I_p$  is the peak current (mA),  $n$  is the number of electrons transferred in the half cell,  $A$  is the electrode area ( $\text{cm}^2$ ),  $C$  is the concentration of  $\text{Zn}^{2+}$  ions ( $\text{mol}/\text{cm}^3$ )  $D$  is the diffusion coefficient of  $\text{Zn}^{2+}$ , and  $v$  is the scan rate ( $\text{mV} \cdot \text{s}^{-1}$ ).

The diffusion coefficient ( $D_{\text{Zn}^{2+}}$ ) was calculated and found to be  $1.15 \times 10^{-5} \text{ cm}^2/\text{s}$  for  $\text{Na}_{0.6}\text{MnO}_2$  and  $4.96 \times 10^{-5} \text{ cm}^2/\text{s}$  for  $\text{Mn}_2\text{O}_3$  for the corresponding reduction process from CV (Fig. 5 (b,e)). The  $D_{\text{Zn}^{2+}}$  calculated using the Randles-Sevcik equation (Fig. S2) and EIS (Fig. 11 (a, c)) agree well for both the cathodes.
